# Supplementary material for: Metabolomic Analysis of Arabidopsis ost1-4 Mutant Revealed the Cold Response Regulation Mechanisms by OPEN STOMATA 1 (OST1) at Metabolic Level
Source: MDPI journal article supplement (doi:10.3390/agronomy13102567), 2023-10-06
Supplement: s1 [file s1]

**Table S1** Primer sequences used in this study

| Gene name     | Primer sequence (5'-3')                              |
|---------------|------------------------------------------------------|
| <i>AtGDH1</i> | F:AACCATGGCTTGGATTCTTG<br>R:CACCAAGATCAATGGGCTTT     |
| <i>AtGDH2</i> | F:AACCATGGCTTGGATTCTTG<br>R:CACCAAGATCAATGGGCTTT     |
| <i>AtPPC1</i> | F:CTTCGAAGCGTAAACCAAGC<br>R:ATTGCTGATCCGAATCCAAG     |
| <i>AtAK1</i>  | F:TGCCATGATGAAGGAATTGA<br>R:CCAGGATATCCCCATTTGTG     |
| <i>AtACT2</i> | F: TCTGAAGGGTAAGTAGAGTAG<br>R: ACTCAGCACATTCCAGCAGAT |

Full sequences of the candidate genes were listed as follows:

>GDH1 CDS sequence

GLUTAMATE DEHYDROGENASE 1      AT5G18170

ATGAATGCTTTAGCAGCAACAAACAGAACTTCAAGTTAGCTGCTAGGCTTCTTGGTCTGGATTCTAAG  
CTCGAGAAAAGTCTTCTCATCCCCTTCCGAGAAATCAAGGTGGAATGTACCATACCGAAAGACGATGGT  
ACACTAGCATCATTCGTTGGGTTTCAAGTTCAACACGACAATGCAAGAGGTCCCATGAAAGGTGGAATC  
AGATATCATCCTGAGGTTGATCCGATGAAGTGAACGCATTGGCTCAGCTCATGACATGGAAAACAGCA  
GTGGCTAAGATTCTTACGGAGGAGCTAAAGGAGGGATTGGTTGTGATCCTAGCAAGCTCAGTATCTCC  
GAGCTCGAGCGGTTGACTCGAGTTTTCACTCAGAAGATTCATGATCTCATTGGGATTCATACTGATGTT  
CCAGCTCCAGATATGGGCACTGGTCCTCAGACAATGGCTTGGATTCTTGATGAATACTCTAAGTTTCAT  
GGATACTCGCCTGCAGTTGTGACTGGAAAACCCATTGATCTTGGTGGATCGCTAGGGAGAGACGCGGCT  
ACTGGAAGAGGAGTGATGTTTGGTACCGAAGCTTTGCTTAACGAGCACGAAAAGACCATATCAGGGCAG  
CGTTTTGTCATCCAGGGATTTGGTAATGTGGGTTCTTGGGCGGCAAAGCTGATAAGTGAAGGGTGGG  
AAGATTGTTGCCGTGAGTGACATTACCGAGCAATCAAGAACAAGGATGGTATCGATATCCCGGCCTTG  
CTCAAGCATACTAAAGAACACAGAGGTGTCAAAGGGTTTGATGGTGCAGATCCGATCGATCCAACTCC  
ATACTGGTTGAGGATTGTGATATCCTCGTCCCTGCAGCACTTGGTGGTGTGATCAACAGGGAGAATGCG  
AATGAGATTAAAGCAAAGTTCATCATAGAAGCAGCTAATCATCCAACTGATCCGACGCGGATGAGATC  
CTAAGTAAGAAAGGTGTGGTTATTCTCCCGACATATATGCAAACCTCTGGAGGAGTCACTGTAAGTTAC  
TTCAATGGGTTTCAAGCATTCAAGGCTTTATGTGGGAGGAAGAGAAGGTGAACGATGAGCTAAAGACT  
TACATGACTCGCTCTTTCAAGGACTTGAAAGAGATGTGCAAACTCACTCTTGGATCTCCGGATGGGA  
GCTTTCACACTCGGTGTTAATCGTGTGGCTCAAGCTACCATTCTCAGAGGCTGGGGAGCTTAA

AtGDH1 RT F:AACCATGGCTTGGATTCTTG

AtGDH1 RT R:CACCAAGATCAATGGGCTTT

>GDH2 CDS sequence

GLUTAMATE DEHYDROGENASE 2

AT5G07440

ATGAATGCTTTAGCTGCAACAAACAGAACTTCCGTCATGCATCTCGAATCCTGGGTTTGGATTCTGAAG  
ATCGAGAGAAGTCTTATGATCCCATTAGAGAAATCAAGGTTGAGTGTACGATTCTAAAGACGATGGC  
ACTCTGGTTTCATACATCGGATTTAGGGTTCAACATGACAATGCTCGTGGACCCATGAAAGGTGGAATC  
AGATATCATCCTGAGGTTGATCCAGATGAAGTTAACGCACTAGCTCAGCTGATGACTTGGAAGACTGCT  
GTAGCAGATATTCCATATGGTGGTGCTAAAGGTGGAATTGGATGTAGTCCTCGTGACTTGAGTTTGAGC  
GAGCTTGAGAGGTTGACTCGTGTGTTTACACAGAAGATTCATGATCTTATCGGTATTCATACCGATGTG  
CCTGCTCCTGATATGGGCACTAACGCTCAAACCATGGCTTGGAATCTTGATGAGTACTCCAAGTTTCAT  
GGTCATTCCCCTGCTGTTGTCACTGGAAAGCCCATTGATCTTGGTGGTTCATTAGGTAGGGAAGCTGCC  
ACAGGTCGTGGTGTAGTATTTGCCACCGAAGCTCTTCTTGCTGAGTACGGGAAATCGATTTCAGGGTTTG  
ACATTTGTTATTCAAGGTTTTGGGAATGTTGGAACATGGGCTGCGAAGCTGATCCACGAGAAAGGCGGT  
AAAGTGGTTGCAGTAAGCGACATTACTGGTGCAATCAGGAACCCTGAAGGTATCGACATCAACGCTCTC  
ATAAAACACAAGGACGCAACTGGAAGTCTCAATGATTTCAATGGTGGAGACGCTATGAATTCAGATGAA  
TTGCTCATTTCATGAGTGTGATGTTCTCATTCCATGCGCTCTTGGTGGTGTCTCTGAACAAGGAAAAATGCT  
GGAGATGTGAAGGCAAAGTTTATAGTAGAGGCAGCTAACCATCCAACAGATCCAGATGCTGATGAGATT  
CTGTGAAGAAAGGAGTGATTATACTTCCAGATATCTACGAAACGCAGGAGGAGTGACAGTGAGTTAC  
TTCGAGTGGGTGCAGAACATTCAAGGATTCATGTGGGAAGAGGAAAAAGTGAAGTTGGAGCTGCAAAAA  
TACATGACTCGAGCCTTTCACAACATCAAGACAATGTGCCATACTCATTCTTGCAACCTCCGTATGGGA  
GCTTTCACTCTTGGAGTTAACCGAGTCGCTCGAGCCACCCAGTTGCGTGGTTGGGAAGCTTAA

AtGDH2 RT F:AACCATGGCTTGGATTCTTG

AtGDH2 RT R:CACCAAGATCAATGGGCTTT

>AtPPC1

ATGGCGAATCGGAAGTTAGAGAAGATGGCATCGATTGATGTTTCATCTTCGTCAACTGGTTCCTGGCAAA  
GTTAGTGAAGACGACAAGCTTGTTGAGTATGATGCTTTGCTTCTAGATCGGTTTCTCGATATCCTCCAG  
GATTTGCACGGTGAAGATCTCCGTGAAACTGTTCAAGAGCTTTATGAGCATTCTGCAGAATACGAAGGG  
AAGCATGAACCTAAGAAGCTAGAGGAGCTAGGGAGTGTGCTAACGAGTTTAGATCCAGGAGATTCCATT  
GTTATCGCTAAAGCTTTCTCTCATATGCTTAACTTAGCCAATTTGGCTGAGGAAGTGCAGATTGCTTAT  
CGCCGTAGGATCAAGAAGCTGAAGAAAGGTGATTTTGTGATGAGAGCTCTGCTACTACTGAATCTGAT  
CTTGAAGAACTTTCAAGAAGCTTGTTGGAGATCTGAACAAGTCTCCTGAAGAGATCTTTGATGCTCTC  
AAGAATCAGACTGTGGATTTGGTTTTGACTGCTCATCCTACTCAGTCTGTGAGAAGATCATTGCTTCAG  
AAACATGGGAGGATAAGAGACTGTCTGGCTCAACTATATGCTAAGGATATTACTCCTGATGACAAGCAA  
GAGCTCGATGAGGCTCTTCAGAGAGAGATTCAAGCTGCATTCCGAACAGATGAAATCAAAAGAACACCA  
CCTACTCCTCAAGATGAGATGAGAGCGGAATGAGTTATTTCCATGAAACTATCTGGAAAGGTGTTCCCT  
AAGTTTCTGCGCCGTGTTGACACGGCTTTGAAAAACATAGGGATCGAAGAACGTGTTCCATATAATGCT  
CCATTGATTTCAGTTCTCTTCTTGGATGGGTGGTGATCGTGACGGTAACCCAAGGGTTACACCTGAAGTC  
ACCAGAGATGTTTGCTTGTTAGCTAGAATGATGGCTGCTACTATGTACTTTAACCAATCGAAGATCTT  
ATGTTTGAGATGTCTATGTGGCGTTGCAATGACGAGCTGCGTGCGGAGCTGATGAAGTTCATGCAAAAT  
TCGAGGAAAGATGCTGCAAAACATTACATAGAATTCTGGAAGTCAATTCCCTACAACTGAGCCATACCGT  
GTGATTCTTGGCGATGTAAGGGACAAGCTTTATCACACACGTGAACGCGCTCATCAACTGCTCAGCAAT

GGACACTCTGATGTCCCTGTAGAGGCTACTTTCATTAACCTTGAACAGTTCTTGGAACCTCTTGAGCTC  
TGTTACCGATCTCTGTGTTTCATGTGGTGATCGTCCAATAGCAGATGGAAGCCTTCTTGATTCTTGAGG  
CAAGTCTCAACCTTTGGGCTCTCTCTTGTGAGACTTGACATAAGGCAAGAATCTGACCGCCACACTGAT  
GTATTGGATGCTATCACCACGCATTTAGATATCGGATCCTACAGAGAGTGGTCTGAAGAACGCCGCCAA  
GAATGGCTTTTATCTGAGCTAAGTGCAAACGTCCGCTTTTCGGTTCTGATCTTCCTAAAACCGAAGAA  
ATAGCTGATGTTCTGGACACGTTTCATGTCATAGCCGAGCTACCAGCAGATAGCTTTGGTGCTTACATT  
ATCTCTATGGCAACTGCACCTTCTGATGTATTAGCTGTTGAGCTTTTACAGCGTGAATGCCGAGTGAAA  
CAGCCTTTGAGAGTTGTTCCGCTCTTTGAGAAGCTAGCAGATCTGGAAGCAGCTCCTGCTGCAGTTGCT  
AGGCTCTTTTCTGTTGATTGGTACAAAAACGAATTAACGGTAAGCAAGAGGTTATGATTGGTTATTTCG  
GATTACAGGAAAAGATGCTGGACGGTTATCTGCTGCTTGGCAGTTATACAAAAGCTCAAGAAGAGCTTG  
AAGGTTGCTAAAGAGTACGGTGTGAAGCTAACAATGTTTCACGGTCGTGGTGGCACGGTCGGAAGAGGA  
GGTGGACCAACCCATCTTGCTATATTGTCTCAGCCTCCGGATACTATTAACGGTTCCCTCCGTGTCACA  
GTTCAAGGTGAAGTCATCGAGCAATCGTTTGGTGAAGAGCACTTATGCTTTAGAACCTTCAGCGTTTC  
ACAGCTGCTACACTCGAGCACGGTATGCGTCCTCCAATTTTCGCCTAAACCAGAATGGCGCGCTTTGCTG  
GATGAAATGGCGGTTGTTGCAACCGAGGAGTATCGCTCAGTTGTGTTCCAAGAACCCTCGGTTTGTGAG  
TACTTCCGCCTCGCTACACCGAACTGGAGTATGGACGTATGAATATCGGAAGCAGACCTTCGAAGCGT  
AAACCAAGCGGTGGCATTGAATCTCTCCGTGCAATTCCATGGATCTTCGCTTGGACTCAAAACAAGATTC  
CATCTTCCTGTATGGCTTGGATTTCGGATCAGCAATTAGACATGTGATCGAAAAAGACGTCAGGAACCTC  
CATATGCTCCAAGATATGTACCAACACTGGCCTTTCTTTAGAGTCACCATTGATCTAATCGAAATGGTG  
TTCGCTAAAGGAGATCCTGGTATTGCTGCTTTGTACGATAAGCTTCTTGTTCAGAGGAACTCTGGCCT  
TTTGGTGAGAACTCAGAGCTAACTTCGAAGAAACCAAGAACTCATCCTCCAGACCGCTGGACACAAA  
GATCTTCTTGAAGGTGATCCTTACTTGAACAGAGACTGAGACTTCGTGATTCTTACATTACAACTCTC  
AATGTCTGTCAAGCTTACACATTGAAGAGAATCCGTGATCCGAGTTACCATGTGACTCTGCGACCACAC  
ATTTCTAAGGAGATAGCGGAATCGAGCAAACCAGCAAAAGAACTCATCGAGCTTAACCCGACTAGCGAA  
TACGCGCCAGGACTTGAAGATACACTCATCTTGACGATGAAGGGTATTGCTGCTGGTCTACAAAACACC  
GGTTAA

AtPPC1 RT F:CTTCGAAGCGTAAACCAAGC

AtPPC1 RT R:ATTGCTGATCCGAATCCAAG

>AtAK1

AT5G13280.1

ATGGCGGCTACTAGGGTTCGTTGTTGTCATAGCAATGCAGCTTTCACCAGATTGCCACTTACCCGCCAC  
CGAAACTCGCCGACGCTACCGATTTCTCTAAATCGTGTCGATTTCCCTACGCTGAAGAAATTATCATTA  
CCCATTGGAGATGGCTCCTCCATTAGAAAAGGTTTCAGGTTTCAGGCAGCAGAAAACATTGTGCGAGCTGTG  
TTGGAAGAGAAGAAGACAGAGGCGATAACGGAGGTAGATGAGAAGGGTATCACGTGCGTGATGAAGTTT  
GGTGGATCTTCGGTGGCGTCAGCTGAGAGAATGAAGGAAGTTGCTGATTTGATTTTGACTTTTCCGGAA  
GAAAGTCCCGTCATTGTTCTCTCTGCTATGGGGAAAACTACCAACAATCTCTTGCTTGCGGGAGAGAAG  
GCGGTTAGTTGTGGTGTCTTAATGCATCTGAGATTGAGGAGTTGAGCATTATAAAGGAATTGCATATC  
AGGACGGTGAAAGAGCTCAACATTGATCCCTCTGTTATTTTGACCTATTTGGAGGAACTGGAGCAACTC  
CTGAAAGGCATTGCCATGATGAAGGAATTGACACTTCGAACCAGAGATTACTTAGTCTCTTTTGGAGAG  
TGTTTGTCTACAAGGATTTTGTCTGCTTATCTTAATACAATCGGTGTCAAGGCACGCCAATATGATGCA  
TTTGAAATTGGTTTCATTACAACGGATGATTTACAAAATGGGGATATCCTGGAGGCAACTTATCCAGCT  
GTTGCCAAGAGATTATATGATGATTGGATGCATGATCCTGCTGTTCCCTATTGTAACAGGTTTCCTTGGG

AAGGGTTGAAAACTGGTGCGGTTACTACCTTGGGTAGGGGTGGCAGTGATTTGACGGCAACCACAATT  
GGTAAAGCGTTGGGTTTAAAAGAGATTCAGGTGTGAAAGATGTCGATGGTGTCTAACATGTGACCCT  
ACTATATATAAGCGAGCTACACCAGTACCATATCTGACATTTGACGAAGCAGCCGAGCTAGCTTATTTT  
GGTGCACAGGTCTTGACCCACAGTCAATGAGACCAGCAAGAGAGGGTGAGATTCCTGTTAGGGTTAAA  
AATTCTTATAACCCTAAGGCTCCTGGAACATCATCACTAAAACAAGAGACATGACCAAGAGTATTCTA  
ACGAGCATTGTTCTGAAACGTAATGTGACCATGCTGGATATAGCAAGCACCCGAATGCTTGGTCAAGTT  
GGCTTTCTTGCAAAGGTATTCTCGATATTTGAGGAGCTTGGCATTTCGGTAGATGTTGTTGCCACTAGT  
GAAGTCAGTATATCTCTGACACTGGATCCTTCAAACTTTGGAGCAGAGAACTGATTCAACAGGAGCTT  
GATCATGTAGTTGAAGAACTGGAGAAAATTGCAGTTGTGAATCTTCTAAAAGGAAGAGCAATCATCTCT  
CTAATTGGGAATGTTCAACATTCCCTCCCTGATTTTAGAGAGGGCGTTTCATGTTCTTTATACCAAAGGT  
GTCAATGTCCAGATGATATCACAAGGAGCATCCAAGGTAAACATTTCCCTTTATAGTAAACGAAGCTGAA  
GCTGAAGGTTGTGTTCAAGCTCTTCACAAATCCTTCTTCGAGAGCGGTGACCTCTCAGAGTTATTGATA  
CAACCCAGACTTGGCAACGGGTCACCTGTCAGGACACTGCAAGTAGAAAAATTGA

AtAK1 RT F: TGCCATGATGAAGGAATTGA

AtAK1 RT R: CCAGGATATCCCCATTTGTG
