# Supplementary figures and images for: Metabolomic Analysis of Arabidopsis ost1-4 Mutant Revealed the Cold Response Regulation Mechanisms by OPEN STOMATA 1 (OST1) at Metabolic Level
Source: MDPI journal article supplement (doi:10.3390/agronomy13102567), 2023-10-06

***ost1-4*<sub>cold</sub> vs *ost1-4*<sub>CK</sub>**

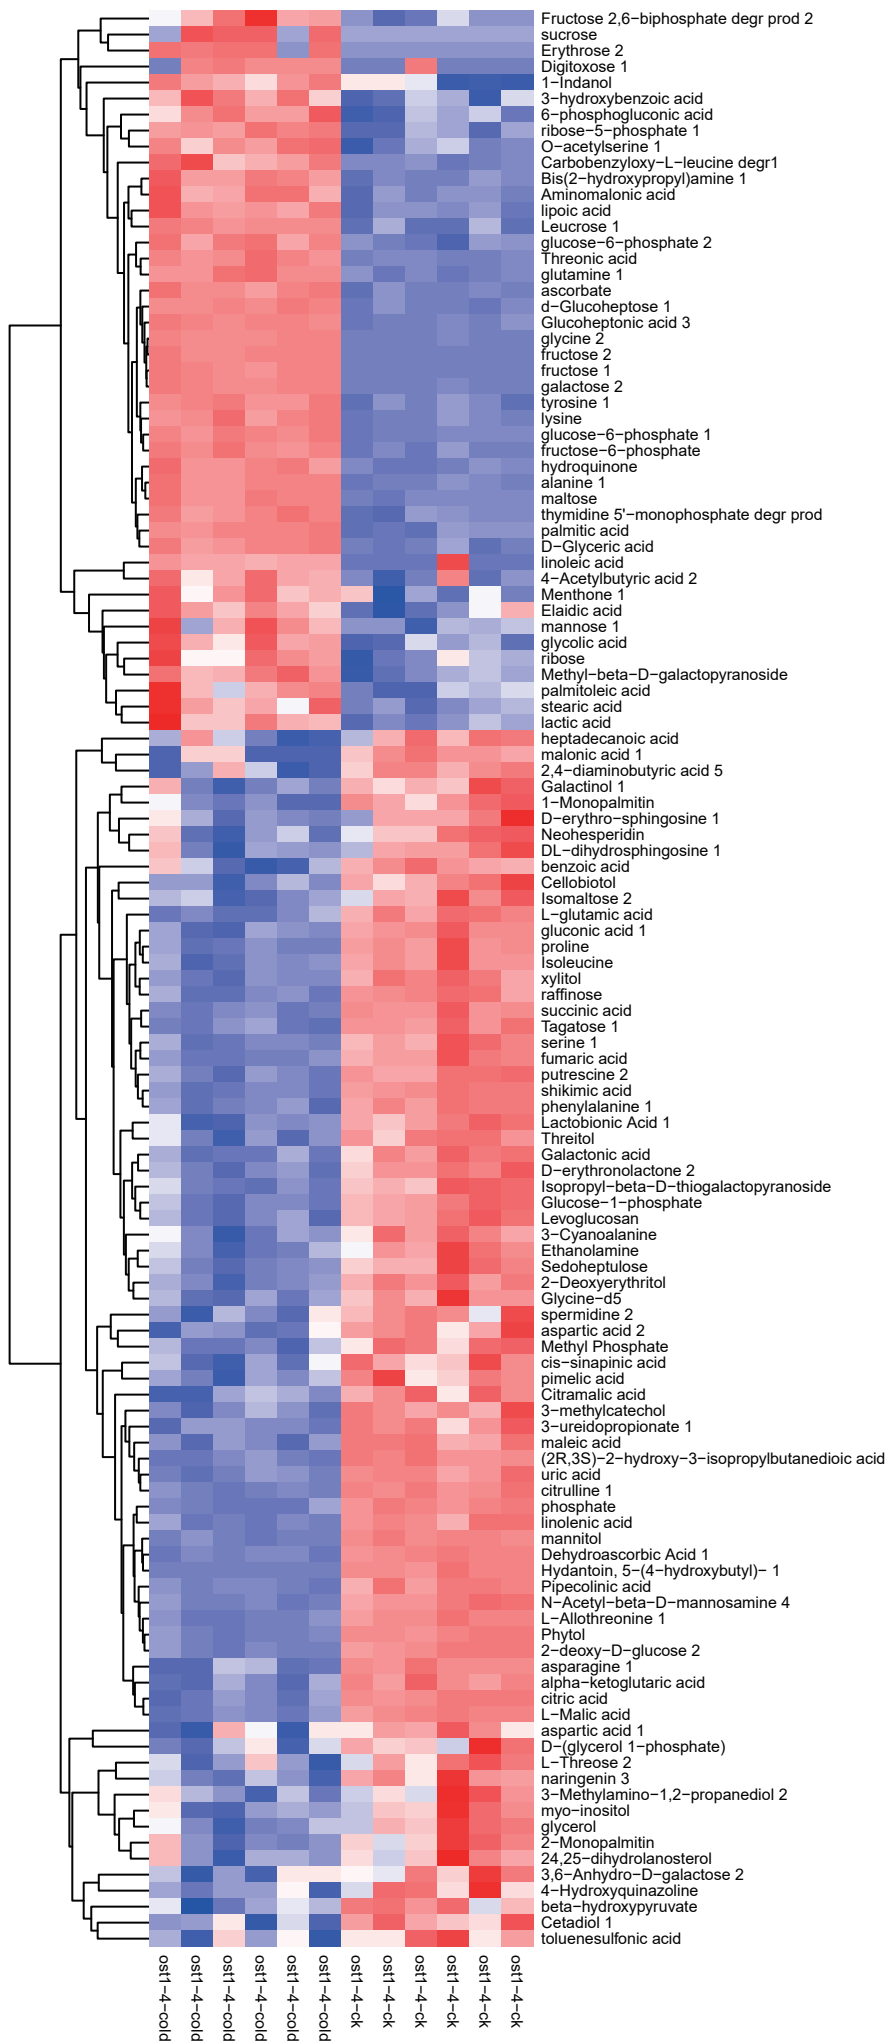

**WT<sub>cold</sub> vs WT<sub>CK</sub>**

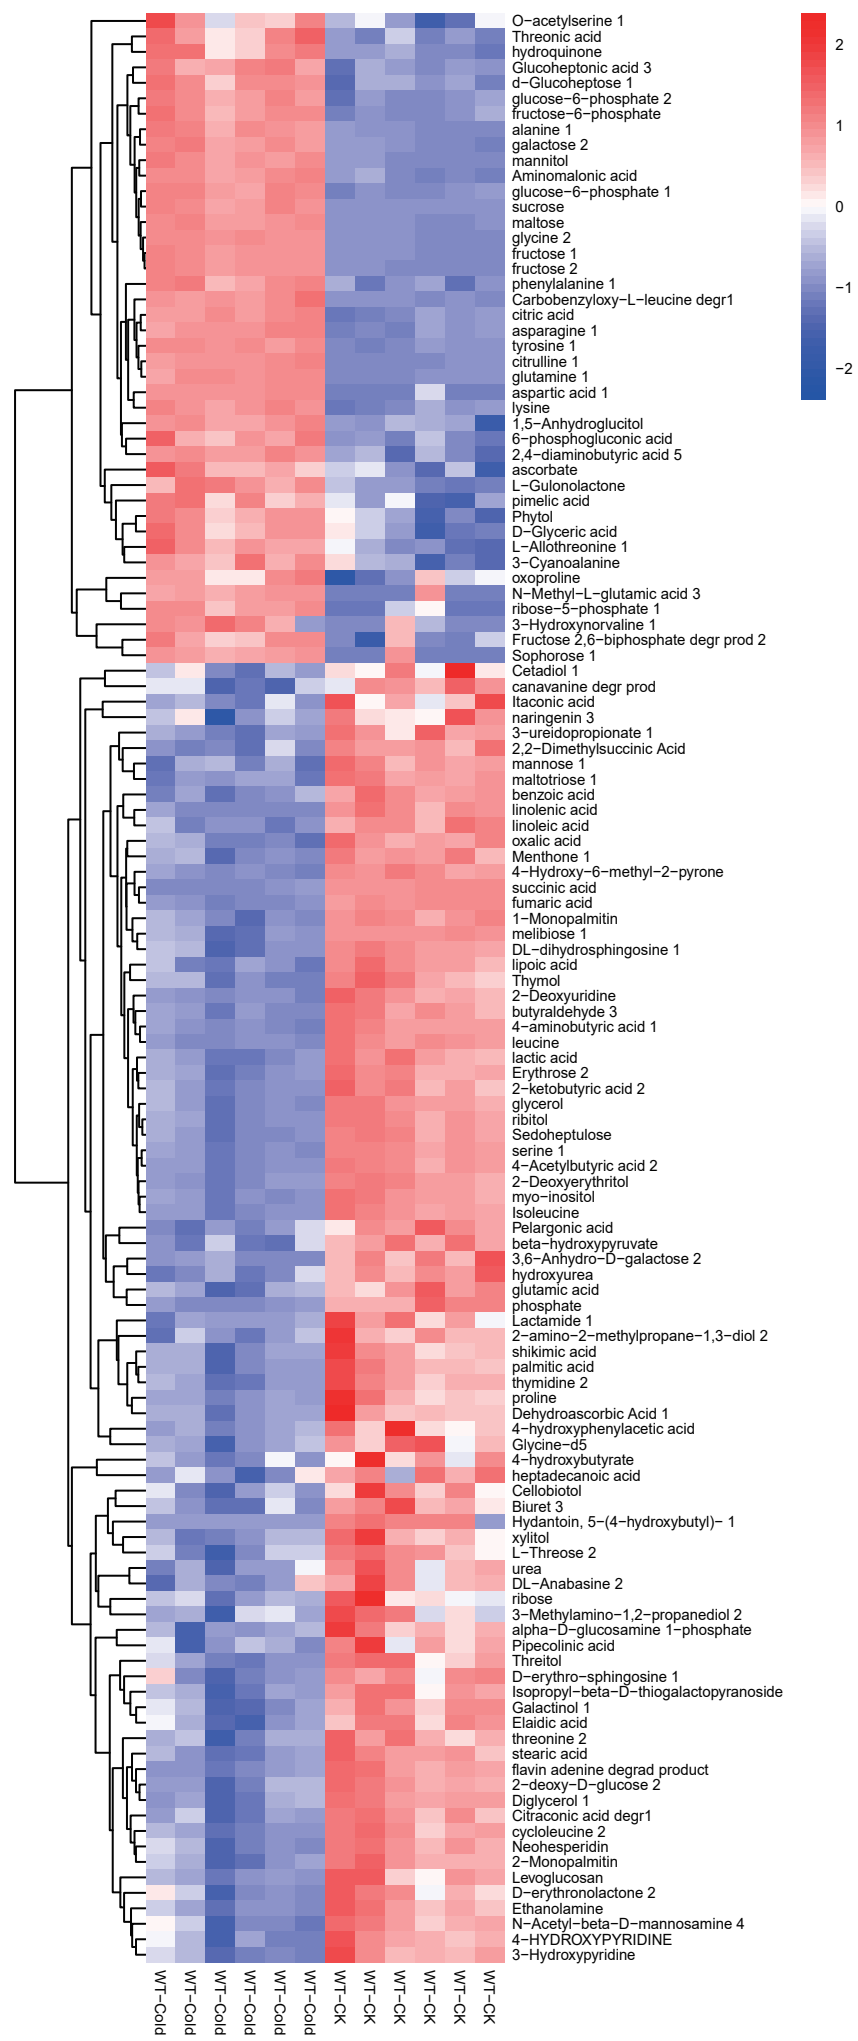

Supplement: s1 [file s1]
